# Supplementary material for: Role of total lung stress on the progression of early COVID-19 pneumonia
Source: Springer Nature journal article supplement (doi:10.1007/s00134-021-06519-7), 2021-09-16
Supplement: MOESM1 [file 19668586]

# Role of lung stress on the progression of early COVID-19 pneumonia

Silvia Coppola MD, Davide Chiumello MD, Mattia Busana MD, Emanuele Giola MD, Paola Palermo MD, Tommaso Pozzi MD, Irene Steinberg MD, Stefano Rolli MD, Federica Romitti MD, Stefano Lazzari MD, Simone Gattarello MD, PhD, Maria Michela Palumbo MD, Peter Herrmann MSc, Leif Saager MD, Michael Quintel MD, Konrad Meissner MD, Luigi Camporota MD, John J. Marini MD, Stefano Centanni MD, Luciano Gattinoni MD, FRCP.

## ONLINE SUPPLEMENT

## Supplemental methods

### Non-invasive respiratory support interfaces

Continuous Positive Airway Pressure (CPAP) was administered through helmet, inflated by a gas mixture of medical oxygen and room air through a high flow generator (VitalSigns inc., Totowa, USA; Myo 3133A, Pulmodyne). Positive End-Expiratory Pressure (PEEP) was set by an adjustable mechanical valve. Non-Invasive Ventilation was administered through a facemask connected to the ventilator.

### Esophageal pressure measurement

Esophageal pressure was measured with a radio-opaque catheter equipped with a balloon in the lower part: SmartCath Bicore, USA or Nutrivent, Sidam Srl., Modena, Italy. Smart Cath was filled with 1.5 mL of air and Nutrivent with 4 mL of air, which are non-stress volumes that prove reliable over a wide pressure range for Smart Cath and Nutrivent (as suggested by Chiumello et al. ‘The assessment of esophageal pressure using different devices: A validation study. Minerva Anestesiol. 2020;86(10):1047-1056. doi:10.23736/S0375-9393.20.14458-4). The body position was standardized at a 40° degrees angle of the upper part of the bed. The catheter was introduced trans-nasally and advanced to reach the stomach (gener­ally at a least depth of 55 cm from the nose). The intragastric position of the catheter was confirmed by a rise in intra-abdominal pressure following external manual epigastric compres­sion. Then, it was retracted into the esophagus (i.e. confirmed by the presence of cardiac arti­facts in the pressure tracing and by the difference in the absolute pressure), in the lower third of the esophagus at a depth between 35 and 40 cm from the nose. All traces were processed and displayed on a dedicated data acquisition system (Optivent SIDAM Srl, Modena, Italy). Here below we report an example of esophageal pressure tracing:

**
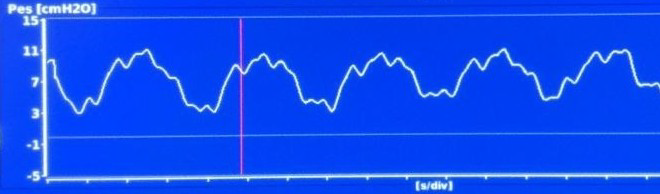
**

Figure S2: Representative esophageal pressure tracing.

### Equations for lung stress derivation

All the following equations refer the static conditions as the pressure needed to move gas is ignored. The total lung stress (i.e., the force that develops inside the structure as a response to an external force applied to it) is equal, in the lung parenchyma, to the transpulmonary pressure. Note that what really matters is the transpulmonary pressure, independently from the origin force that generates it (i.e., artificial, muscular or a combination of both). Total lung stress may be conceptualized as including two components: a static component, which is the stress present at baseline, due to the application of constant positive pressure at end-expiration (PEEP) and a dynamic stress (i.e., driving transpulmonary pressure) which is associated to the lung inflation and deflation.

The dynamic stress equals the driving transpulmonary pressure (ΔPL-dyn). Therefore:

*(1)*

Where ΔPaw is the inspiratory pressure minus the end-expiratory pressure. ΔPpl is the inspiratory pleural pressure minus the expiratory pleural pressure. As the changes of pleural pressure equal the changes of esophageal pressure, ΔPpl can be surrogated by ΔPes. ΔPes can be defined as:

(*2*)

Note that the sign (positive or negative) of ΔPes needs to be kept when performing the calculations.

*(3)*

During assisted mechanical ventilation the possible action of the patient’s muscles (Pmus) on the pleural pressure changes must be considered. Note that ΔPpl-dyn is equal to ΔPes. Therefore:

*(4)*

This equation describes the changes of pleural pressure (equal to ΔPes) when both mechanical ventilation and muscular activity are acting together. Note that ΔPaw alone increases ΔPes while the ΔPmus decreases it. This justifies the subtraction between ΔPaw and ΔPmus. The Ew/ETOT is the ratio between the chest-wall elastance and total respiratory system elastance and EL/ETOT is the ratio between the lung elastance and the total respiratory system elastance.

*(5)*

Where ΔV is the tidal volume.

*(6)*

ΔPmus, rearranging equation can be computed as:

*(7)*

Therefore, the ΔPL-dyn (that equals the driving transpulmonary pressure) can be computed substituting equation 4 in equation 3:

*(8)*

Rearranging:

*(9)*

Therefore, the total lungstress (PL), which includes also the contribution of PEEP, can be calculated as follows:

*(10)*

If EL/ETOT cannot be computed because the tidal volume is not measured, the EL/ETOT may be assumed to be equal to 0.7, which is a reasonable average in supine patients with ARDS (without severe obesity or chest wall anatomical alterations). Therefore, the total lung stress, rearranging equation 10, can be expressed as:

*(11)*

Where ΔPaw – ΔPes is equal to ΔPL-dyn

## Supplemental results


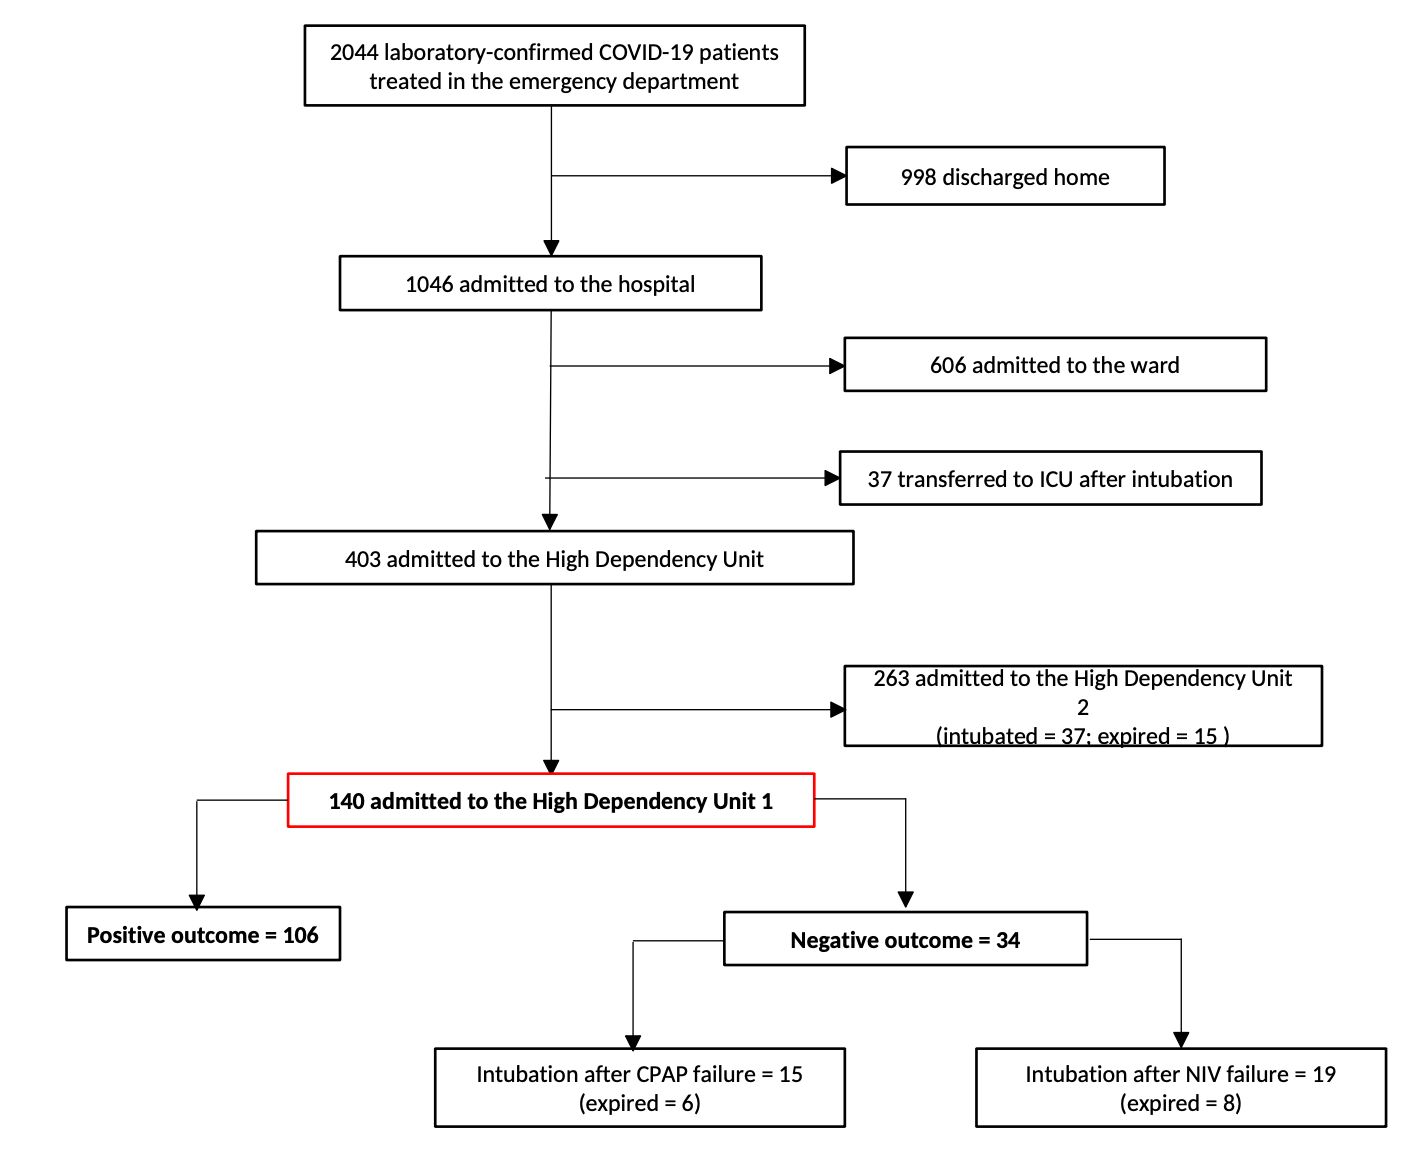


**Figure S1**: Flow-chart of the patients presenting to the emergency department of San Paolo Hospital with confirmed COVID-19 infection, between September 2020 and March 2021 (2nd wave). As shown, 998 were immediately discharged home. Out of 1046 admitted patients, 37 were immediately intubated and transferred to the ICU. Six-hundred and six were transferred the ward and 403 patients with CT scan showing bilateral COVID-19 pneumonia were admitted to 2 different High-Dependency Unit. The choice between HDU 1 or 2 only depended on bed availability. Two hundred sixty-three were admitted to the HDU 2 (not enrolled in the study), while 140 were admitted to the HDU 1, and were all enrolled in the study. Hundred and six of them had positive outcome, while 34 had a negative one and were eventually transferred to the ICU. Fifteen were immediately intubated after C-PAP while 19 were intubated after a brief bridge period (not more than 4 hours) of NIV. Fourteen patients finally died.

*
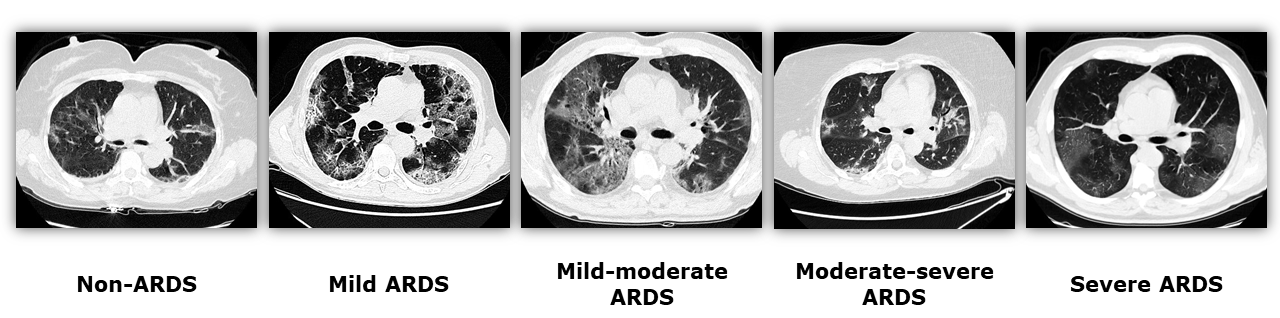
*

**Figure S3:** lung Computed Tomography (2-3 cm below the carina) extracted randomly from the non-ARDS, mild ARDS, mild-moderate ARDS, moderate-severe ARDS and severe ARDS. As shown, it is hard to find a relationship between the severity of the imaging and the severity of the hypoxemia.

*Reasons for intubation for each patient:*

As intubation is a clinical decision for which possible tables and scores are usually inappropriate, we preferred to report here below the reasons reported by the attending physician to justify the failure of the non-invasive support and the subsequent intubation. As shown, in general, the decision was made based on the progression of the respiratory distress and it must be noted that 14 out of 34 patients died in-hospital.

1. Agitation, intolerance to both NIV and CPAP. In ambient air SpO2 75%, respiratory rate 45 bpm.
2. After 6 days in CPAP, esophageal pressure swing 18 cmH2O with PEEP 10 cmH2O, FiO2 0.8, PaO2/FiO2 150 mmHg.
3. Esophageal pressure swing 20 cmH2O from supine, PaO2/FiO2 88 mmHg.
4. After 36 hours of CPAP and pronation, esophageal pressure swing 19, abdominal respiratory mechanics.
5. After 48 hours of CPAP, respiratory rate 35, esophageal pressure swing 13 cmH2O, PaO2/FiO2 92 mmHg.
6. Intolerant to CPAP, delirium. PaO2/FiO2 70 mmHg.
7. PaO2/FiO2 < 100 mmHg when supine, 280 from prone, absence of dyspnea.
8. Respiratory rate 30 bpm during NIV, absence of dyspnea, PaO2/FiO2 90 mmHg.
9. Sudden deterioration with respiratory rate 30 bpm, heart rate 130 bpm, SpO2 70%, Dyspnea.
10. During NIV tidal volume of 1 liter, minute ventilation 20 l/min, abdominal respiratory mechanics, esophageal pressure swing 18 cmH2O.
11. PaO2/FiO2 59 mmHg, during CPAP esophageal pressure swing 9 cmH2O.
12. Septic shock.
13. Respiratory rate 35 bpm, respiratory distress.
14. Worsening of CT scan, intolerant to NIV, esophageal pressure swing of 15 cmH2O, respiratory rate 35 bpm.
15. PaO2/FiO2 80 mmHg, esophageal pressure swing 13 cmH2O, dyspnea.
16. Agitation, during CPAP PaO2/FiO2 77 mmHg, 14 cmH2O of esophageal pressure swing, Acute Kidney Injury.
17. High inspiratory effort during NIV, esophageal pressure swing 9 cmH2O.
18. Delirium, in NIV PaO2/FiO2 136 mmHg, esophageal pressure swing 10 cmH2O.
19. During NIV respiratory rate 33 bpm, esophageal pressure swing 5 cmH2O, PaO2/FiO2 90 mmHg.
20. During NIV esophageal pressure swing 9 cmH2O, abdominal respiratory mechanics, PaO2/FiO2 128 mmHg.
21. During NIV esophageal pressure swing 11 cmH2O, respiratory rate 32 bpm with FiO2 0.8, PEEP 10 cmH2O and SpO2 98%.
22. During NIV esophageal pressure swing 11 cmH2O, PaCO2 55 mmHg, PaO2/FiO2 120 mmHg, Abdominal respiratory mechanics.
23. Intolerant to NIV, during CPAP esophageal pressure swing 10 cmH2O, PaO2/FiO2 114 mmHg.
24. PaO2/FiO2 99 mmHg during NIV.
25. During NIV esophageal pressure swing 12 cmH2O, abdominal respiratory mechanics, PaO2/FiO2 240 mmHg.
26. During NIV, esophageal pressure swing 10 cmH2O, minute ventilation 18 l/min, PaO2/FiO2 149 mmHg.
27. During NIV, esophageal pressure swing 9 cmH2O, respiratory rate 30 bpm, Borg dyspnea scale 5, PaO2/FiO2 190 mmHg.
28. During NIV with FiO2 0.9, PEEP 10 cmH2O, PaO2/FiO2 51 mmHg, PaCO2 40 mmHg, respiratory rate 24 bpm, esophageal pressure swing 6 cmH2O.
29. During NIV, esophageal pressure swing 9 cmH2O, Borg dyspnea scale 5, abdominal respiratory mechanics, PaO2/FiO2 124 mmHg.
30. During NIV, esophageal pressure swing 11 cmH2O, PaO2/FiO2 155 mmHg, intolerant to pronation.
31. During NIV Borg dyspnea score 4, esophageal pressure swing 18 cmH2O, PaO2/FiO2 168 mmHg, PaCO2 30 mmHg.
32. During CPAP respiratory rate 30 bpm, abdominal respiratory mechanics, esophageal pressure swing 10 cmH2O, PaO2/FiO2 169 mmHg.
33. During NIV, esophageal pressure swing 12 cmH2O, PaO2/FiO2 79 mmHg, PaCO2 35 mmHg.
34. During NIV, esophageal pressure swing 14 cmH2O, Borg dyspnea scale 4, PaO2/FiO2 166 mmHg.

**Table S1:** Univariate regression analysis between the variables and outcome. Overall (n = 140; negative outcome (n = 34), positive outcome (n = 106). As shown, the variables significantly associated with negative outcome were: esophageal pressure swing, total lung stress and PaO2/FiO2 ratio.

| **Variable** | **Odds ratio** | **Confidence Interval** | **p value** |
| --- | --- | --- | --- |
| **Age (years)** | 1.03 | 0.99-1.08 | 0.16 |
| **BMI (kg/m2)** | 0.98 | 0.88-1.07 | 0.73 |
| **Respiratory rate (bpm)** | 1.04 | 0.96-1.12 | 0.35 |
| **Esophageal pressure swing (cmH2O)** | **1.13** | **1.01 – 1.27** | **0.032*** |
| **Positive End-Expiratory Pressure (cmH2O)** | 0.98 | 0.71-1.34 | 0.92 |
| **Total lung stress (cmH2O)** | **1.17** | **1.06 – 1.31** | **0.004*** |
| **PaCO2 (mmHg)** | 0.94 | 0.86-1.01 | 0.12 |
| **PaO2/FiO2 (mmHg)** | **0.99** | **0.98 – 0.99** | **0.020*** |
| **Δ SpO2 between 0 and 10 cmH2O** | 0.88 | 0.75-1.00 | 0.07 |
| **Δ Esophageal pressure swing between 0 and 10 cmH2O** | 1.04 | 0.91-1.19 | 0.54 |
| **Δ Respiratory rate (bpm)** | 1.02 | 0.92-1.13 | 0.65 |
| **D-dimer (ng/dl)** | 0.99 | 0.99-1.00 | 0.76 |
| **Non-aerated tissue mass (g)** | 1.00 | 0.99-1.00 | 0.09 |
| **Lung weight (g)** | 1.00 | 0.99-1.00 | 0.29 |

**Table S2:** Variable changes measured between the previous and the last day before outcome (positive = non-intubated; negative = intubated).

| **Variable** | **Overall (n = 140)** | **Intubated (n = 34)** | **Non-intubated (n = 106)** | **p value** |
| --- | --- | --- | --- | --- |
| **Total lung stress (cmH2O)** | 0 [-1.7 - 1.0] | 2 [0.5 - 7.0] | 0.5 [-2.3 - 1.0 ] | <0.001 |
| **PaO2/FiO2 (mmHg)** | -9.5 [-72 - 58] | -19 [-72- -2.3] | 9 [-71 - 70] | 0.06 |
| **PaCO2 (mmHg)** | -0.6 [-2.7 - 1.9] | 0.0 [-1.7 - 3.1] | -0.6 [-2.7 - 1.7] | 0.29 |
| **pH** | 0.0 [-0.02 - 0.02] | 0.0 [-0.02 - 0.02] | 0.0 [-0.02 - 0.02] | 0.72 |

**Table S3**: in the table we present data derived from Maiolo et. al [14] relative to typical ARDS, involving 227 patients, where data were taken at end-expiration during end-expiratory pause (at 5 cm H2O of PEEP). Data are expressed as mean +/- SD. For consistency, in this table we presented data from 140 COVID-19 pneumonia patients, as a mean +/- SD (while in the text same values were reported as median and IQR).

| **CT pathoanatomy** | **Model** | **Mild** | **Mild-moderate** | **Moderate** | **Severe** |
| --- | --- | --- | --- | --- | --- |
| **Gas-volume (ml)** | **COVID-19** | 2279 [1023] | 2023 [959] | 2265 [867] | 3161 [1752] |
| **ARDS** | 1230 [540] | 1280 [600] | 1110 [710] | 940 [680] |
| **Non-inflated (ml)** | **COVID-19** | 163 [169] | 125 [91] | 129 [135] | 106 [47] |
| **ARDS** | 430 [78] | 490 [152] | 770 [231] | 1200 [328] |
| **Tissue mass (g)** | **COVID-19** | 1095 [414] | 997 [309] | 1076 [303] | 1158 [296] |
| **ARDS** | 1260 [230] | 1290 [400] | 1630 [490] | 2140 [570] |

Number of individuals for each group: Mild, COVID: 51; ARDS: 38. Mild-moderate, COVID: 26; ARDS: 50. Moderate, COVID: 35; ARDS: 55. Severe, COVID: 10; ARDS: 84. Data expressed as mean [SD]. All comparisons between COVID-19 pneumonia and ARDS are highly significant (p <0.001), but the tissue mass of COVID-19 vs. ARDS in “mild” subgroup (p = 0.0295)

It must be noted that: 1) classification of ARDS subgroups, in COVID-19 population, was done not at the time of CT scan, but few hours later in the HDU; 2) the CT scan was taken during breathing at 0 cmH2O of PEEP. Therefore, in COVID-19 CT scans, the gas-volume is possibly overestimated due to the presence of some fraction of tidal volume. However, for what the first point is concern, we do not believe that a CT scan has changed dramatically compared to the classification done few hours later. Possible small variations should not alter the overall picture. For what the gas-volume is concerned, the possible overestimation of gas-volume, compared to the classical ARDS, in COVID-19 patients it could be likely compensated by the absence of PEEP. More important, however, are the tremendous difference in tissue, in particular, the non-inflated tissue. This is true despite the possible underestimation in the Maiolo cohort, where CT scan was taken at 5 cmH2O of PEEP instead of 0 cmH2O used in COVID-19 patients.
